# Supplementary material for: Transient Receptor Potential Mucolipin-1 Channels in Glioblastoma: Role in Patient’s Survival
Source: PubMed Central journal article supplement (PMC6521337; doi:10.3390/cancers11040525), 2019-04-12

## Supplementary Materials: Transient Receptor Potential Mucolipin-1 Channels in Glioblastoma: Role in Patient's Survival

Maria Beatrice Morelli, Consuelo Amantini, Daniele Tomassoni, Massimo Nabissi, Antonella Arcella and Giorgio Santoni

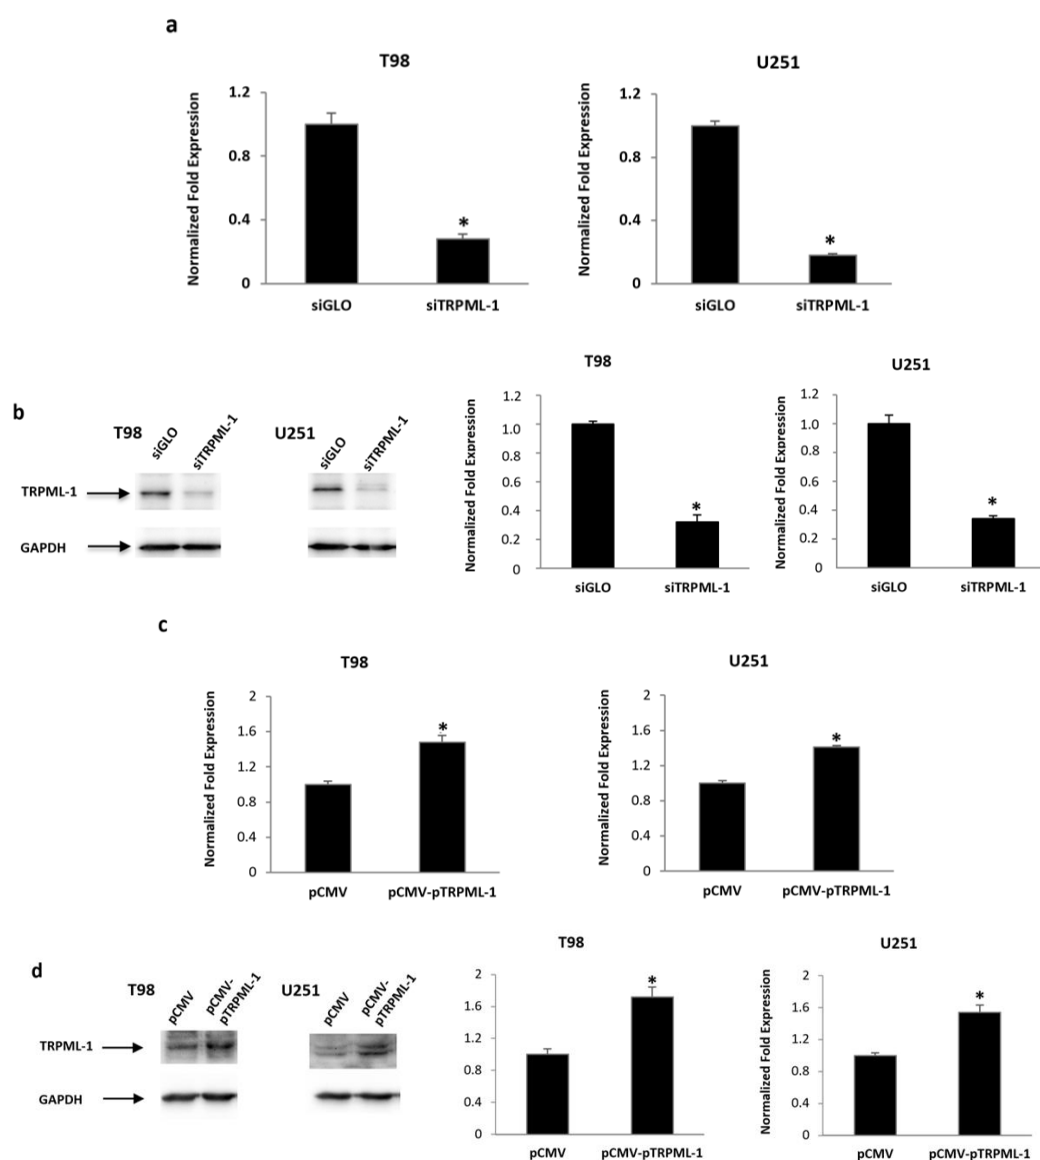

**Figure S1.** TRPML-1 silenced and overexpressed models. **(a)** TRPML-1 mRNA levels were evaluated by qRT-PCR in siTRPML-1 and siGLO T98 and U251 cells after 48 h of transfection. Relative TRPML-1 expression, normalized to GAPDH mRNA levels, was calculated using siGLO as calibrator. Statistical analysis was performed comparing siTRPML-1 with siGLO transfected cells, \*  $p < 0.01$ . **(b)** Lysates from siGLO and siTRPML-1 T98 and U251 transfected cells were separated on SDS-PAGE and probed with anti-human TRPML-1 Ab. GAPDH protein levels were evaluated as loading control. Relative TRPML-1 expression values after 72 h of transfection were calculated using siGLO as calibrator. Blots are representative of three separate experiments. \*  $p < 0.01$  vs. siGLO. **(c)** TRPML-1 mRNA levels were evaluated by qRT-PCR in pCMV and in pCMV-pTRPML-1 T98 and U251 cells after 48 h of transfection. Relative

TRPML-1 expression, normalized to GAPDH mRNA levels, was calculated using pCMV as calibrator. Statistical analysis was performed comparing pCMV-pTRPML-1 with pCMV transfected cells, \*  $p < 0.01$ . (d) Lysates from pCMV and pCMV-pTRPML-1 T98 and U251 transfected cells were separated on SDS-PAGE and probed with anti-human TRPML-1 Ab. GAPDH protein levels were evaluated as loading control. Relative TRPML-1 expression values after 72 h of transfection were calculated using pCMV as calibrator. Blots are representative of three separate experiments. \*  $p < 0.01$  vs. pCMV.

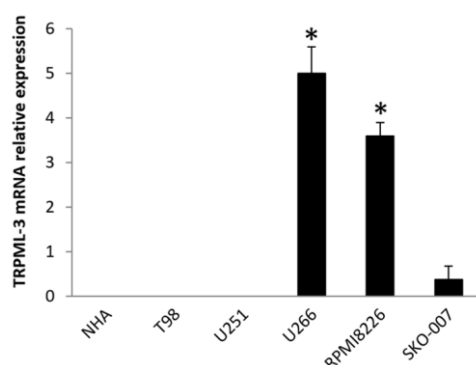

**Figure S2.** TRPML-3 expression in GBM cell lines. The relative TRPML-3 mRNA expression in NHA, T98 and U251 glioma cell lines, and in U266, RPMI8226 and SKO-007 myeloma multiple cell lines used as positive controls was evaluated by qRT-PCR. TRPML-3 mRNA levels were normalized for GAPDH expression. Data are expressed as mean  $\pm$  SD. \*  $p < 0.05$  vs. NHA, T98, U251 and SKO-007.

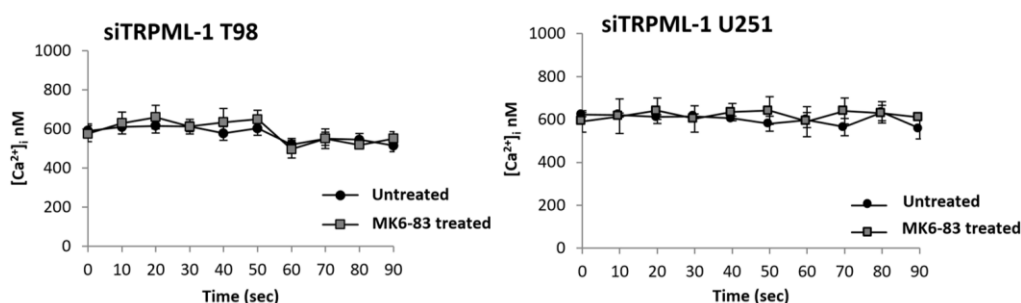

**Figure S3.** Intracellular calcium measurements in silenced glioma cells. Time course of the  $[Ca^{2+}]_i$  rise was evaluated by FACS analysis in siTRPML-1 T98 and U251 GBM cells untreated or treated with 10  $\mu$ M and 25  $\mu$ M of MK6-83, respectively. Data shown are the mean  $\pm$  SD of three independent experiments.

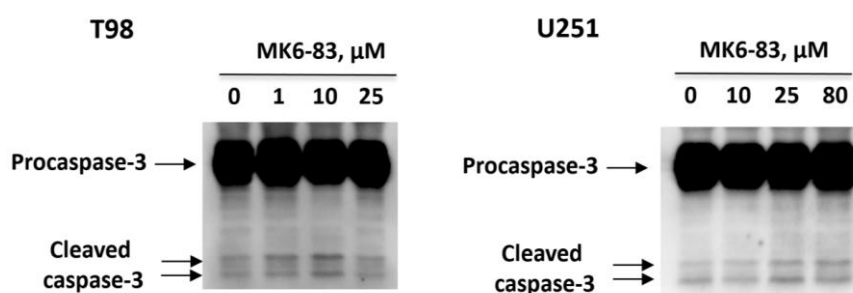

**Figure S4.** MK6-83 induces caspase-3 cleavage in a dose-dependent manner. T98 and U251 cells were treated with different doses of MK6-83. Proteins were separated on 14% SDS-PAGE and probed with anti-caspase-3 Ab. Blots are representative of three separate experiments.

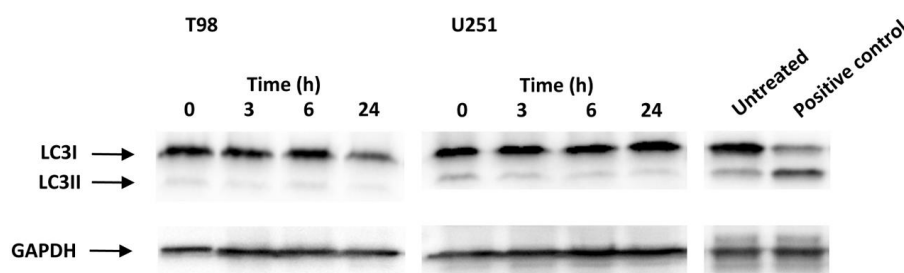

**Figure S5.** MK6-83 does not induce autophagy in GBM cell lines. Lysates from T98 and U251 cells treated for 24 h with 25 and 78  $\mu$ M of MK6-83, respectively, were separated on 14% SDS-PAGE and probed with anti-LC3 and anti-GAPDH Abs. GAPDH protein levels were evaluated as loading control. Blots are representative of one of three separate experiments.

**Table S1.** GBM (grade IV) patient characteristics.

| Patients Characteristics        | % of samples ( <i>n</i> ) |
|---------------------------------|---------------------------|
| <b>Number of patients</b>       | <b>66</b>                 |
| <b>Sex</b>                      |                           |
| Men                             | 47% ( <i>n</i> = 31)      |
| Women                           | 53% ( <i>n</i> = 35)      |
| <b>Age, years</b>               |                           |
| < 45                            | 55% ( <i>n</i> = 36)      |
| >45                             | 45% ( <i>n</i> = 30)      |
| <b>GBM MGMT methylation</b>     |                           |
| Non detected                    | 32% ( <i>n</i> = 21)      |
| Methylated                      | 36% ( <i>n</i> = 24)      |
| Non methylated                  | 32% ( <i>n</i> = 21)      |
| <b>GBM Recidivated</b>          |                           |
| Not detected                    | 9% ( <i>n</i> = 6)        |
| Not recidivated                 | 14% ( <i>n</i> = 9)       |
| Recidivated                     | 77% ( <i>n</i> = 51)      |
| <b>Adjuvant therapy</b>         |                           |
| No                              | 13% ( <i>n</i> = 9)       |
| STUPP                           | 56% ( <i>n</i> = 37)      |
| Fotemustine                     | 8% ( <i>n</i> = 5)        |
| RT                              | 11% ( <i>n</i> = 7)       |
| Other:                          | 12% ( <i>n</i> = 8)       |
| -Temozolomide                   | 38% (3/8)                 |
| -Fotemustine + Bevacizumab      | 38% (3/8)                 |
| -Fotemustine + RT               | 12% (1/8)                 |
| -Fotemustine + RT + Bevacizumab | 12% (1/8)                 |

Clinicopathological characteristics of the 66 GBM patients analyzed for TRPML-1 mRNA and protein expression. Stupp protocol comprises: radiotherapy (total 60 Gy, 2 Gy per daily fraction over 6 weeks); temozolomide (during radiotherapy: 75 mg per square meter of body-surface area per day, 7 days per week; post-radiotherapy (adjuvant): six cycles consisting of 150-200 mg per square meter for 5 days during each 28-day cycle). RT, radiation therapy.

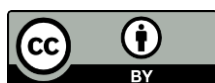

Supplement: cancers-11-00525-s001.pdf [file cancers-11-00525-s001.pdf]
